# Supplementary material for: An ‘active site anchoring’ strategy for the preparation of PBO fiber derived carbon catalyst towards an efficient oxygen reduction reaction and zinc–air batteries
Source: Royal Society of Chemistry journal article supplement (doi:10.1039/d3ra07694f), 2023-01-01
Supplement: d3ra07694f1.pdf [file d3ra07694f1.pdf]

## Electronic Supplementary Information

# An “Active Site Anchoring” Strategy for the Preparation of PBO Fiber Derived Carbon Catalyst with Efficient Oxygen Reduction Reaction and Zinc-Air Batteries

Weihua Zhong<sup>a,b</sup>, Zuoxu Xiao<sup>b</sup>, Yunjun Luo<sup>a,\*</sup>, Dianbo Zhang<sup>b</sup>, Xiangdong Chen<sup>b</sup>, Jinwang Bai<sup>b</sup>

<sup>a</sup> *School of Materials Science & Engineering, Beijing Institute of Technology, 100081, Beijing, China*

<sup>b</sup> *Shandong Institute of Nonmetallic Materials, Jinan, 250031, Shandong, China*

## **Characterization**

Raman spectra were carried out on a laser Raman microscope system (HORIBA Evolution Raman scope) with the excitation wavelength of 532 nm. X-ray diffraction patterns were performed on a Rigaku Ultima IV X-Ray Diffractometer. FESEM images were observed on field-emission scanning electron microscope (SEM, Quant 250FEG). High-resolution transmission electron microscopy images were collected at an acceleration voltage of 200 kV (TEM, JEM-2100F).

## **Electrochemical measurements**

The electrochemical measurements were evaluated using a CHI660E electrochemical work station in a standard three-electrode setup with a glass carbon electrode loaded with the catalysts was used as the working electrode. The procedure for the preparation of a working electrode was as following: 5 mg of the catalyst powder was dispersed in 800  $\mu\text{L}$  of absolute ethanol and 30  $\mu\text{L}$  of Nafion to obtain a homogeneous ink under ultrasonication, then 10  $\mu\text{L}$  of the ink was slightly dropped on the working electrode. For ORR tests, cyclic voltammetry (CV) curves were tested in a  $\text{N}_2$ -saturated or  $\text{O}_2$ -saturated 0.1 M KOH electrolyte with a scan rate of 50  $\text{mV s}^{-1}$ . RDE tests was measured in  $\text{O}_2$ -saturated 0.1 M KOH electrolyte at 10  $\text{mV s}^{-1}$ .

## **Zinc-air battery tests:**

The measurements of zinc-air batteries were evaluated under ambient conditions. A polished zinc plate and 6.0 M KOH solution were used as anode and electrolyte, respectively. The cathode was prepared by loading catalysts on the carbon paper (catalyst loading amount of 1.0 mg cm<sup>-2</sup>).

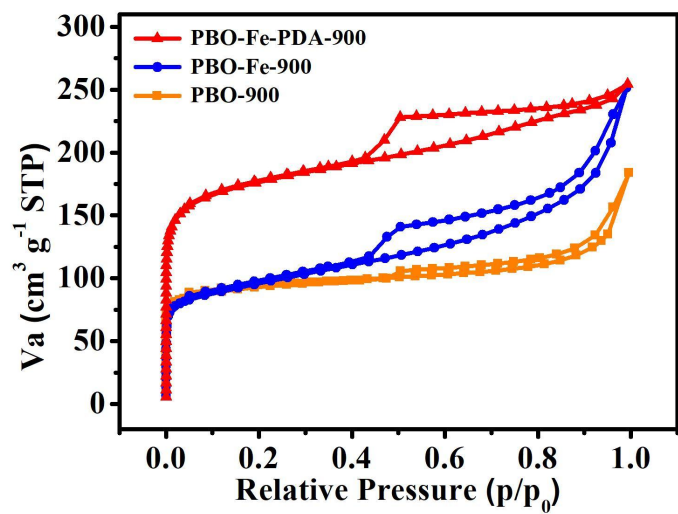

**Fig. S1.** Nitrogen adsorption/desorption curves of PBO-900, PBO-Fe-900 and PBO-Fe-PDA-900.

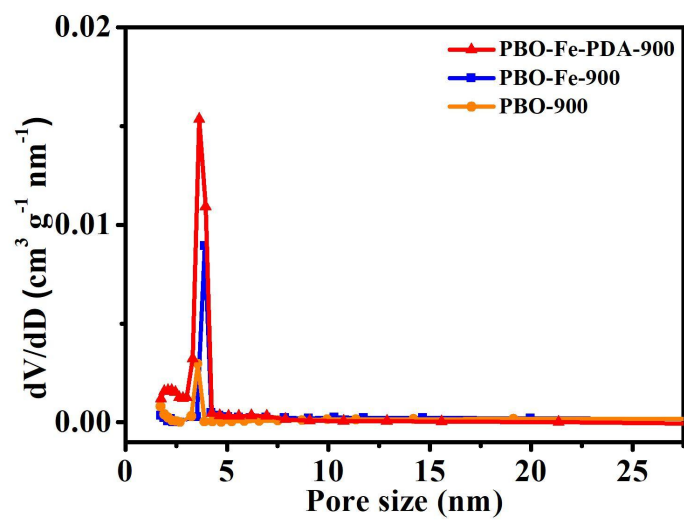

**Fig. S2.** Pore size distributions of PBO-900, PBO-Fe-900 and PBO-Fe-PDA-900.

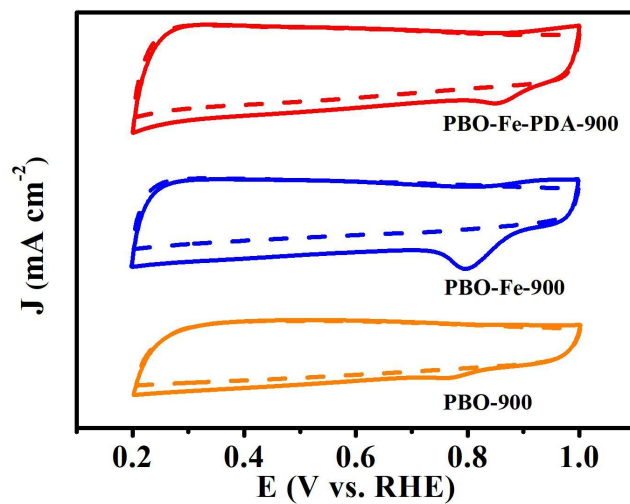

**Fig. S3.** CV curves of PBO-900, PBO-Fe-900 and PBO-Fe-PDA-900 in O<sub>2</sub>-saturated (solid lines) and N<sub>2</sub>-saturated (dot lines) 0.1 M KOH at 50 mV s<sup>-1</sup>, respectively.

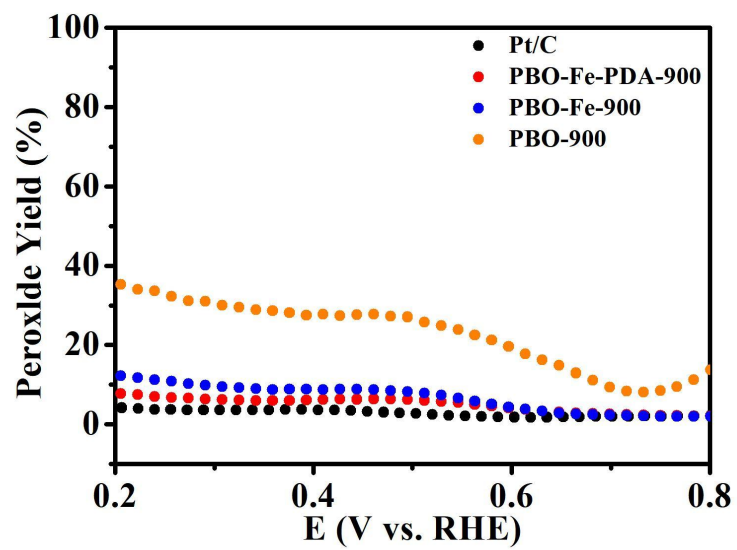

Fig. S4. Peroxide yield of the comparative catalysts.

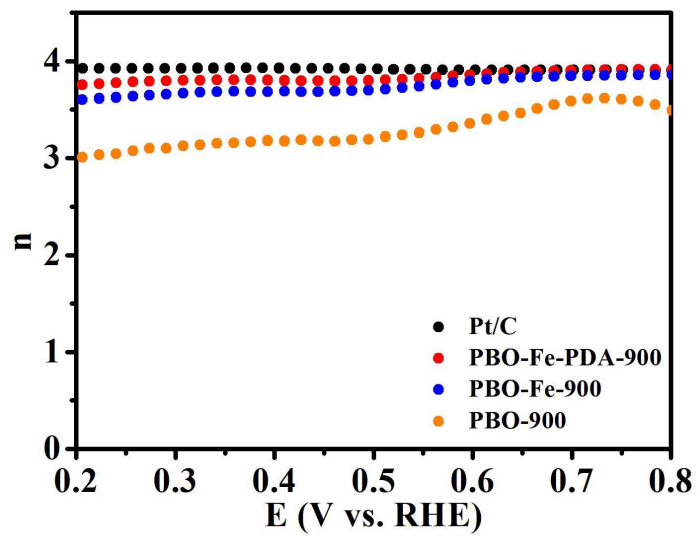

**Fig. S5.** Transferred electron number of the comparative catalysts.



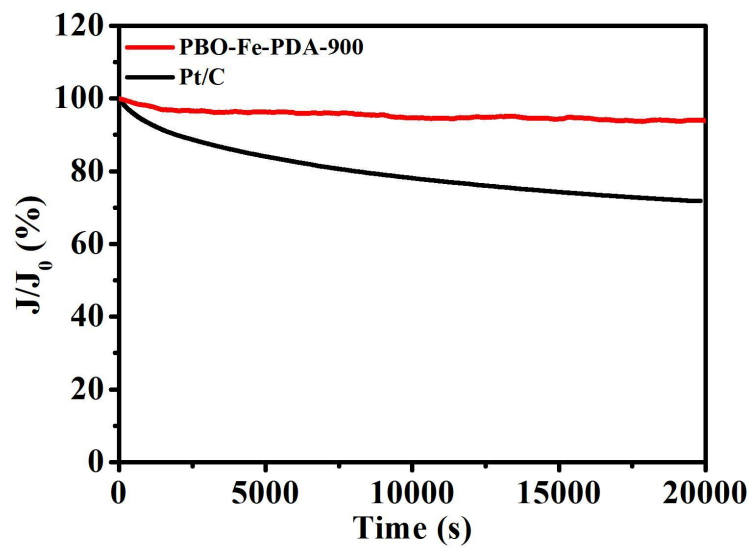

**Fig. S6.** Amperometric *i-t* curves of PBO-Fe-PDA-900 and wt% Pt/C.

**Table S1.** Comparison of the ORR performance for PBO-Fe-PDA-900 and other non-noble metal-based catalysts in 0.1 M KOH.

| Catalyst                               | $E_{1/2}/V$ | Tafel Slope/mV dec <sup>-1</sup> | catalytic stability | Reference                                         |
|----------------------------------------|-------------|----------------------------------|---------------------|---------------------------------------------------|
| PBO-Fe-PDA-900                         | 0.86        | 73                               | 93% (20000 S)       | This Work                                         |
| N-rich Fe-NC                           | 0.78        | 70.72                            | 98.3% (7200 S)      | J. Alloys Compd. 2021,<br>884                     |
| Cu-Fe-N-C                              | 0.86        | 100.1                            | /                   | Appl. Catal. B-Environ.<br>2019, 242: 209-217     |
| Fe <sub>3</sub> C-C                    | 0.82        | 73.9                             | 85% (30000 S)       | ACS Appl. Nano Mater.<br>2021, 4: 8360-8367       |
| FeNC-900                               | 0.848       | 61.4                             | 92% (30000 S)       | Carbon 2019, 154:466-<br>477                      |
| Fe <sub>3</sub> O <sub>4</sub> /N-CNTs | 0.804       | /                                | 94% (20000 S)       | Int. J. Hydrogen Energy,<br>2022, 47: 20529-20539 |
| Fe-N-S-CNS                             | 0.829       | 60.4                             | 94.3% (50000 S)     | Chem Eng J, 2021, 420:<br>127601.                 |
| Co-Ni<br>(trace)/NCNTs                 | 0.83        | /                                | 97.8% (20000 S)     | Int. J. Hydrogen Energy,<br>2022, 47: 7761-7769   |

Fe/NPCF-900a

0.83

85

83.6% (50000 S)

Nanoscale. 2019, 11,

10257-10265

---
